# Supplementary material for: Simultaneous determination of deuterium-labeled ergosterol and brassicasterol in stroke-prone spontaneously hypertensive rats by ultra-high performance liquid chromatography-electrospray ionization-tandem mass spectrometry
Source: Royal Society of Chemistry journal article supplement (doi:10.1039/d2ay01705a), 2022-01-01
Supplement: d2ay01705a1.pdf [file d2ay01705a1.pdf]

## Electronic Supplementary Information

### Simultaneous determination of deuterium-labelled ergosterol and brassicasterol in stroke-prone spontaneously hypertensive rats by ultra-high performance liquid chromatography electrospray ionization tandem mass spectrometry

Koichi Machida, Yuji Koseki<sup>#</sup>, Akira Kotani, Kazuhiro Yamamoto, Tsuyoshi Miura<sup>\$</sup>,  
Hideki Hakamata\*

Departments of Analytical Chemistry and <sup>\$</sup>Pharmaceutical Chemistry, and <sup>#</sup>Center for the Advancement of Pharmaceutical Education, School of Pharmacy, Tokyo University of Pharmacy and Life Sciences, Tokyo 192-0392, Japan

\*Corresponding author

#### Table of contents

|                                                                                                    |                         |
|----------------------------------------------------------------------------------------------------|-------------------------|
| <b>I.</b> <i>Ergosterol -d<sub>1</sub> synthesis</i>                                               | Scheme S1, Figure S1-S4 |
| <b>II.</b> <i>Brassicasterol -d<sub>1</sub> synthesis</i>                                          | Scheme S2, Figure S5-S6 |
| <b>III.</b> <i>Calibration curves of ergosterol-d<sub>1</sub> and brassicasterol-d<sub>1</sub></i> | Figure S7               |
| <b>IV.</b> <i>MRM Chromatograms of the lower limit of quantification</i>                           | Figure S8               |

## I. Ergosterol-*d*<sub>1</sub> synthesis

### 1. Materials and methods

Ergosterol (>95.0%), 4-phenyl-1,2,4-triazoline-3,5-dione (PTAD, 97%), and NaBD<sub>4</sub> (>90%) were purchased from Sigma-Aldrich Japan. Pyridinium chlorochromate (PCC, >98.0%) was obtained from Tokyo Chemical Industry Co., Ltd. Florisil (60-100 mesh) and molecular sieves 4A were from Nacalai Tesque, Inc, Dichloromethane was from Kanto Chemical Co., Inc. CaCO<sub>3</sub> (>99.5%), magnesium sulfate (anhydrous, >98.0%), acetone (>99.5%), hexane (>96.0%), diethyl ether (>99.5%), chloroform (>99.0%), ethyl acetate (>99.5%), methanol (>99.8%), xylene (>80%) and 1,8-diazabicyclo[5.4.0]undec-7-ene (DBU, >98.0%) were from FUJIFILM Wako Pure Chemicals. CeCl<sub>3</sub>·7H<sub>2</sub>O (>99%) was from Kishida Chemical Co., Ltd. Chloroform-*d* (>99.8% D, 0.03 v/v% TMS) was from Acros Organics. All other solvents and reagents were obtained commercially and used without further purification.

TLC was performed on a glass plate precoated with silica gel (Merck 60 F245). Column chromatography was performed with silica gel (Yamazen, particle size 60Å, pore size 40 microns). <sup>1</sup>H-NMR spectra were measured in CDCl<sub>3</sub> solution using Bruker Avance™-III HD NanoBay (400 MHz) spectrophotometers and CHCl<sub>3</sub> (7.26 ppm for <sup>1</sup>H) as a reference. All NMR spectra were recorded in CDCl<sub>3</sub> at 25°C. When chemical shifts were multiplicities, the following abbreviations are used: s, singlet; d, doublet; q, quintet; m, multiplet.

### 2. Synthesis of ergosterol-*d*<sub>1</sub>

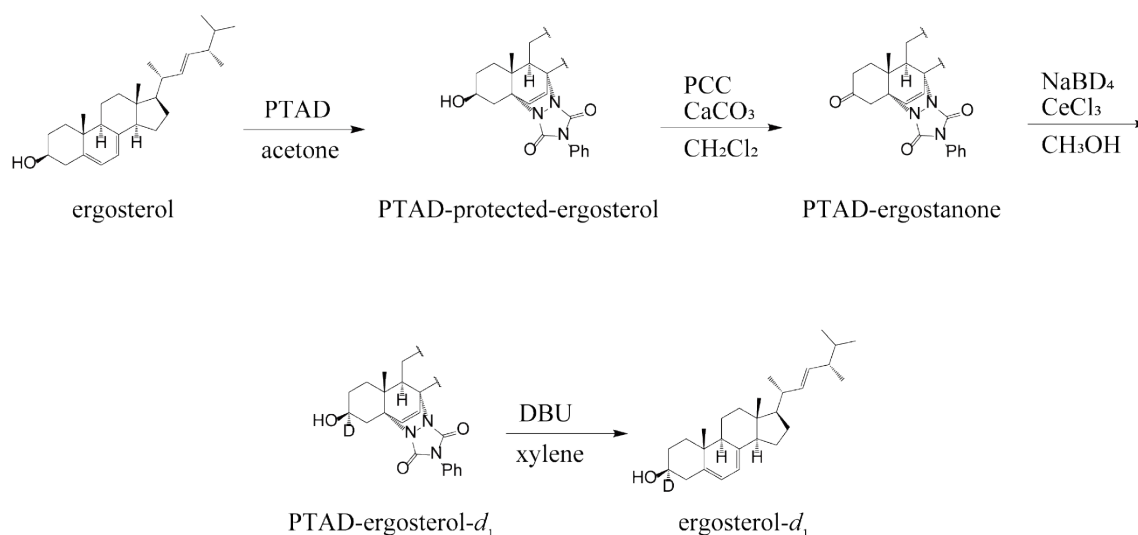

**Scheme S1** Synthesis of ergosterol-*d*<sub>1</sub>

#### Conversion of ergosterol to PTAD-protected ergosterol

Ergosterol (10.8 g, 27.2 mmol) was dissolved in acetone (456 mL). To a solution of ergosterol was added a solution of 4-phenyl-1,2,4-triazoline-3,5-dione (PTAD, 5.1 g) in acetone (273 mL), the mixture stirred for 40 h at room temperature. The reaction mixture was quenched with water and extracted three times with ethyl acetate. The ethyl acetate layers were combined,

washed with brine, dried over anhydrous  $\text{MgSO}_4$ , and then filtered. Removal of solvent from the extract under reduced pressure gave a product, which was PTAD-protected ergosterol (16.15 g, 27.5 mmol) as a yellow solid in 103.7% yield.  $^1\text{H-NMR}$  (400 MHz,  $\text{CDCl}_3$ )  $\delta$  7.40 (m, 4H, Ph), 7.29 (m, 1H, Ph), 6.38 (d, 1H,  $J=8.4$  Hz, H6), 6.21 (d, 1H,  $J=8.3$  Hz, H7), 5.19 (m, 2H, H22 and 23), 4.43 (m, 1H, H3), 3.15 (dd, 1H,  $J=13.8, 13.9$  Hz, H4e), 1.02 (d, 3H,  $J=6.6$  Hz, H21), 0.95 (s, 3H, H19), 0.89 (d, 3H,  $J=6.8$  Hz, H28), 0.81 (m, 6H, H26 and 27), 0.79 (s, 3H, H18).

### **Conversion of PTAD-protected ergosterol to PTAD-ergostanone**

PTAD-protected ergosterol (16.15 g, 28.34 mmol) was dissolved in dichloromethane (800 mL). To this solution was added  $\text{CaCO}_3$  (9.09 g), molecular sieve 4A (11.7 g) and pyridinium chlorochromate (PCC, 18.3 g), and stirred at room temperature. After stirring for 2 h, the mixture was purified with florisil and silica gel layered dry column vacuum chromatography passed through diethyl ether 1500 mL and chloroform 2500 mL and collect each solution. These solutions were concentrated under reduced pressure to give a product, which was PTAD-ergostanone (14.7 g, 25.1 mmol) in 91.3% yield.  $^1\text{H-NMR}$  (400 MHz,  $\text{CDCl}_3$ )  $\delta$  7.39 (m, 4H, Ph), 7.28 (m, 1H, Ph), 6.57 (d, 1H,  $J=8.2$  Hz, H6), 6.23 (d, 1H,  $J=8.3$  Hz, H7), 5.20 (m, 2H, 22 and 23), 3.58 (d, 1H,  $J=18.5$  Hz, H4e), 2.78 (d, 1H,  $J=18.5$  Hz, H4a), 1.08 (s, 3H, H19), 1.01 (d, 3H,  $J=6.6$  Hz, H21), 0.90 (d, 3H,  $J=6.8$  Hz, H28), 0.88 (s, 3H, H18), 0.83 (m, 6H, H26 and 27)

### **Conversion of PTAD-ergostanone to PTAD-ergosterol- $d_1$**

To a stirred solution of PTAD-ergostanone (14.7 g, 25.7 mmol) in methanol (900 mL) was added  $\text{NaBD}_4$  (2.15 g) and  $\text{CeCl}_3 \cdot 7\text{H}_2\text{O}$  (19.1 g), and the mixture was stirred at  $0^\circ\text{C}$  for 30 min. The reaction mixture was quenched with water and extracted three times with  $\text{CHCl}_3$ . Removal of the solvent from the  $\text{CHCl}_3$  layer under reduced pressure gave a mixture containing PTAD-ergosterol- $d_1$ . The residue was purified by  $\text{SiO}_2$  column chromatography to give PTAD-ergosterol- $d_1$  (3.36 g, 5.71 mmol) in 22.7% yield.  $\text{SiO}_2$  column chromatography conditions: mobile phase, ethyl acetate(A)-hexane(B) mixture, 0-103 min 60% B; detection wave length, 220 nm.  $^1\text{H-NMR}$  (400 MHz,  $\text{CDCl}_3$ )  $\delta$  7.38 (m, 4H, Ph), 7.27 (m, 1H, Ph), 6.38 (d, 1H,  $J=8.3$  Hz, H6), 6.22 (d, 1H,  $J=8.3$  Hz, H7), 5.19 (m, 2H, H22 and 23), 3.15 (d, 1H,  $J=14.0$  Hz, H4e), 1.02 (d, 3H,  $J=6.6$  Hz, H21), 0.96 (s, 3H, H19), 0.88 (d, 3H,  $J=6.8$  Hz, H28), 0.80 (m, 6H, H26 and 27), 0.79 (s, 3H, H18)

### **Conversion of PTAD-ergosterol- $d_1$ to ergosterol- $d_1$**

To a solution of PTAD-ergosterol- $d_1$  (3.36 g, 4.16 mmol) in xylene (100 mL) was added 1,8-diazabicyclo[5.4.0]undec-7-ene (DBU, 3.10 g), and the mixture was stirred at  $150^\circ\text{C}$  for 2 h. The reaction mixture was evaporated under reduced pressure to give a mixture containing ergosterol- $d_1$ . The residue was purified by  $\text{SiO}_2$  column chromatography and recrystallized from aqueous hexane to give ergosterol- $d_1$  (1.74 g, 4.38 mmol) in 74.6% yield. Eventually, ergosterol- $d_1$  was obtained by 4 steps (16% overall yield) from ergosterol.  $\text{SiO}_2$  column chromatography conditions: mobile phase, ethyl acetate(A)-hexane(B) mixture, 0-90 min 50% B; flow rate, 20 mL/min;

detection wave length, 254 nm.  $^1\text{H-NMR}$  (400 MHz,  $\text{CDCl}_3$ )  $\delta$  5.53 (dd, 1H,  $J = 5.6, 5.6$  Hz, H6), 5.34 (m, 1H, H7), 5.16 (m, 2H, H22 and 23), 2.44 (dd, 1H,  $J = 2.2, 2.2$  Hz, H4e), 2.29 (d, 1H,  $J = 0.48$  Hz, H4a), 0.99 (s, 3H, H19), 0.89 (d, 3H,  $J = 6.8$  Hz, H28), 0.80 (m, 6H, H26 and 27), 0.59 (s, 3H, H18).

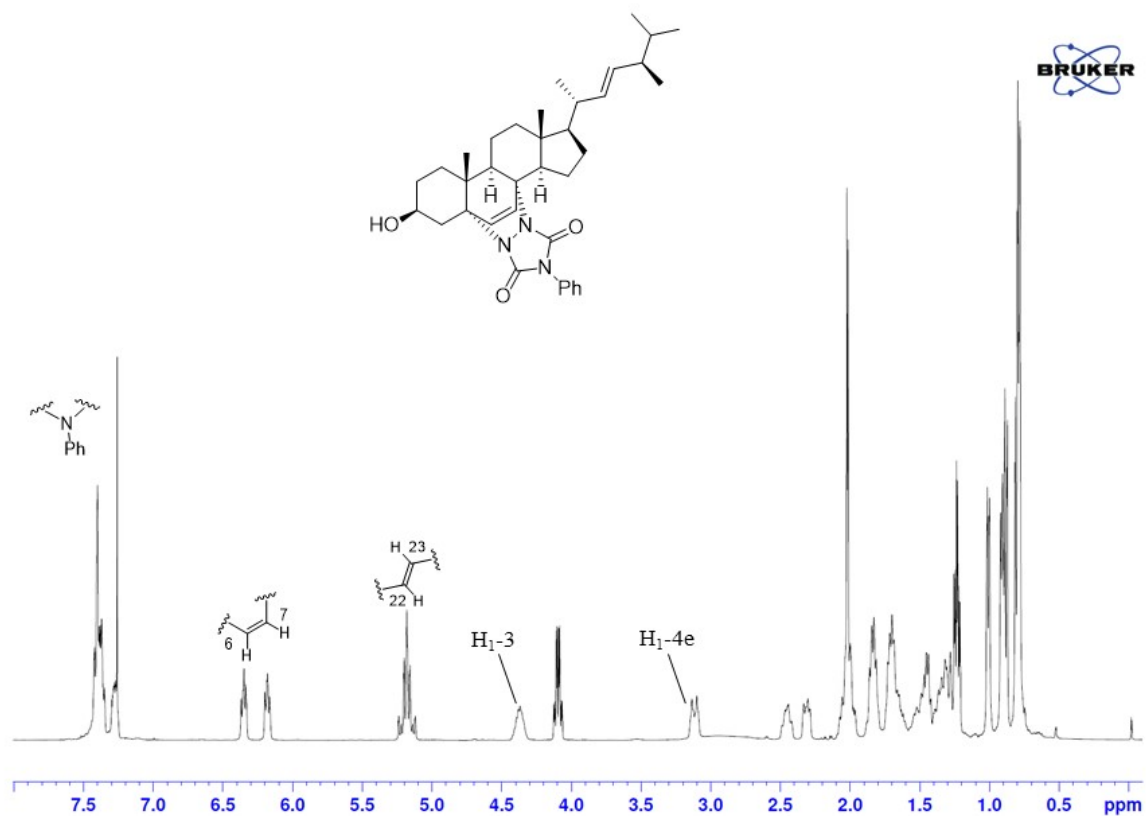

**Figure S1**  $^1\text{H-NMR}$  spectrum of PTAD-protected-ergosterol

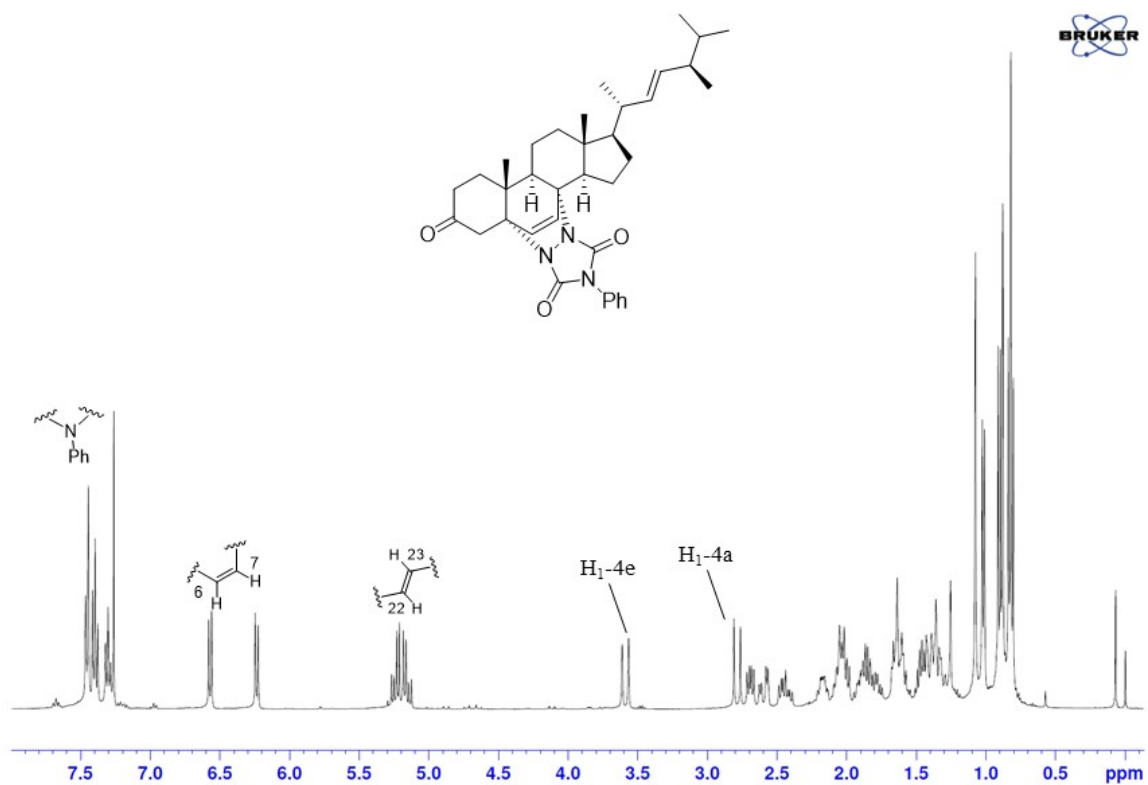

**Figure S2**  $^1\text{H-NMR}$  spectrum of PTAD-protected-ergostanone

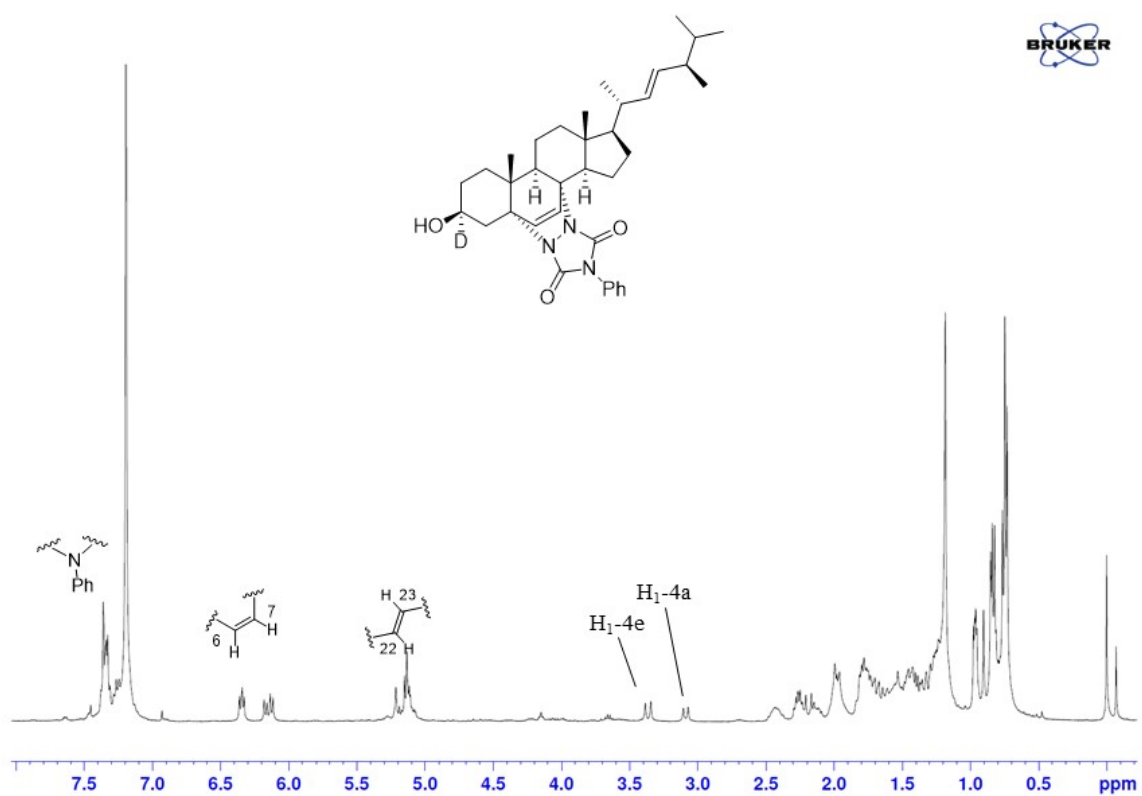

**Figure S3**  $^1\text{H-NMR}$  spectrum of PTAD-protected-ergosterol- $d_1$

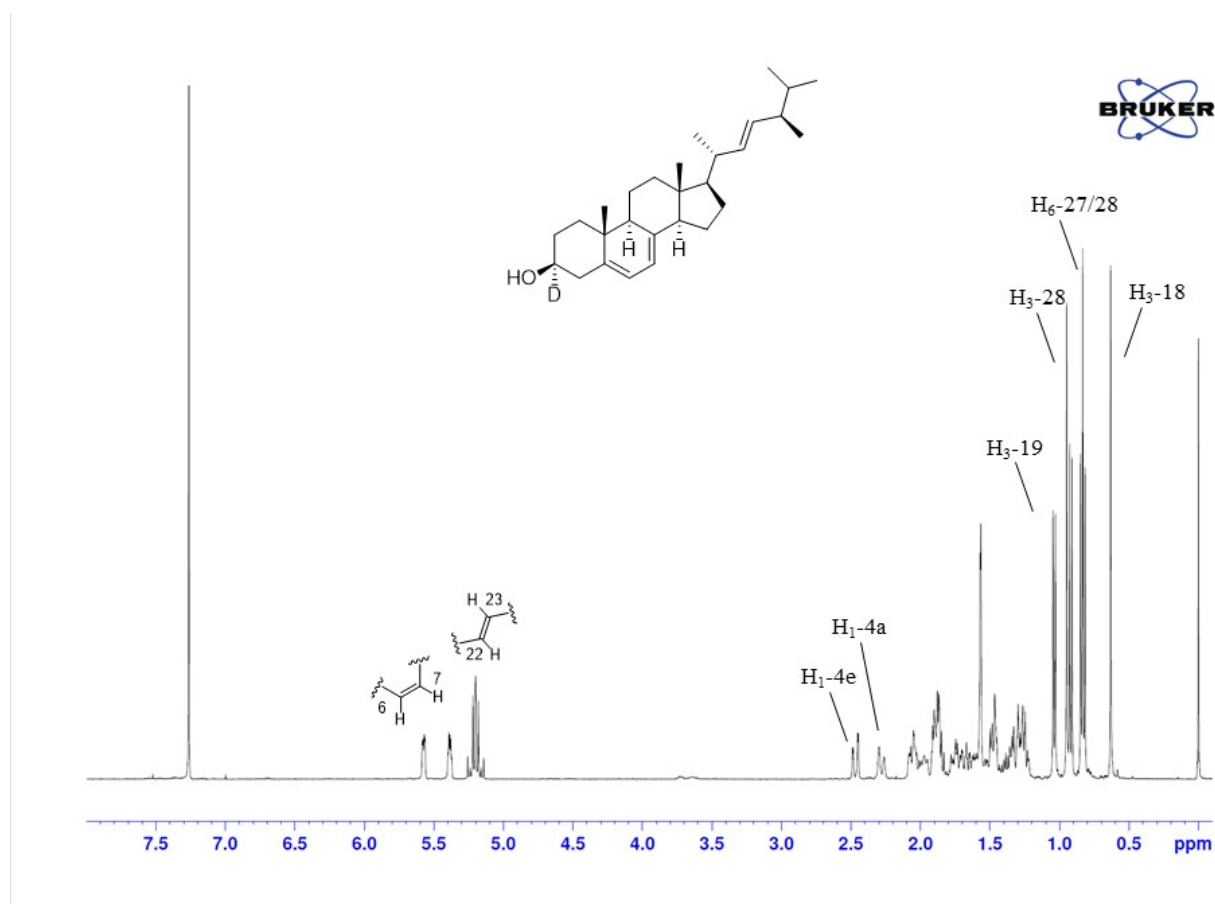

**Figure S4**  $^1\text{H}$ -NMR spectrum of ergosterol- $d_1$

## II. Brassicasterol- $d_1$ synthesis

### 1. Materials and methods

Brassicasterol (>98.3%) was purchased from Tama Biochemical Co., Ltd (Tokyo, Japan). Other reagents used were obtained from the same manufactures as described in materials and methods of Ergosterol- $d_1$  synthesis. TLC and  $^1\text{H}$ -NMR were also performed as described in materials and methods of Ergosterol- $d_1$  synthesis.

### 2. Synthesis of brassicasterol- $d_1$

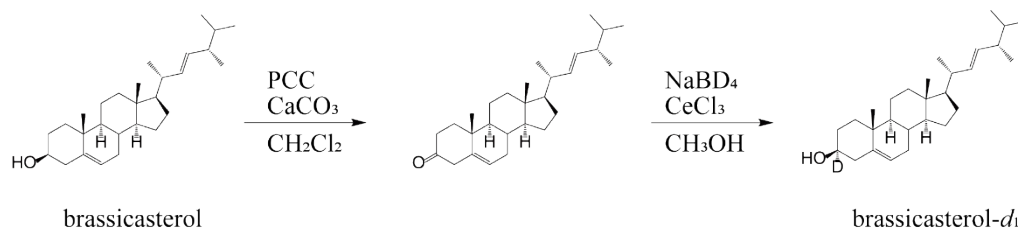

**Scheme S2** Synthesis of brassicasterol- $d_1$

### Conversion of brassicasterol to brassicasterone (compound 1)

Brassicasterol (100 mg, 0.251 mmol) was dissolved in dichloromethane (8 mL).  $\text{CaCO}_3$  (20 mg) and molecular sieve 4A (96 mg) was added to the substance solution, and stirred at room

temperature. Then, pyridinium chlorochromate (PCC, 156 mg) was added to the solution and stirred at the same temperature. After 60 min, the mixture was purified with florisil and silica gel layered dry column vacuum chromatography passed through  $\text{CH}_2\text{Cl}_2$  20 mL and diethyl ether 30 mL and collect each solution. These solutions were concentrated under reduced pressure to give a crude product, which was compound **1** (18.1 mg, 0.0456 mmol) in 18.2% yield. The amount of compound **1** was not enough, so the above steps were repeated to give a compound **1** (87.5 mg, 0.221 mmol) in 87.9% yield.  $^1\text{H-NMR}$  (400 MHz,  $\text{CDCl}_3$ )  $\delta$  5.26 (m, 1H, H6), 5.12 (m, 2H, H22 and 23), 3.22 (d, 1H,  $J=16.4$  Hz, H4e), 2.45 (d, 1H,  $J=16.4$  Hz, H4a), 0.94 (s, 3H, H19), 0.85 (d, 3H,  $J=6.8$  Hz), 0.77 (m, 6H, H26 and 27), 0.65 (s, 3H, H18).

### Conversion of **1** to brassicasterol- $d_1$

To a stirred solution of **1** (105.6 mg, 0.266 mmol) in methanol (10 mL) was added  $\text{NaBD}_4$  (26 mg) and  $\text{CeCl}_3 \cdot 7\text{H}_2\text{O}$  (235 mg), and the mixture was stirred at  $0^\circ\text{C}$  for 45 min. The reaction mixture was quenched with water, and extracted with  $\text{CHCl}_3$ . Removal of the solvent from the  $\text{CHCl}_3$  layer under reduced pressure gave a mixture containing brassicasterol- $d_1$ . The residue was purified by  $\text{SiO}_2$  column chromatography to give brassicasterol- $d_1$  (62.8 mg, 0.157 mmol) as clear crystal in 59.0% yield. Eventually, brassicasterol- $d_1$  was obtained by 2 steps (31% overall yield) from brassicasterol.  $\text{SiO}_2$  column chromatography conditions: mobile phase, acetone(A)-hexane(B) mixture, 0-100 min 95% B, 100-110 min 0% B; detection wave length, 220 nm.  $^1\text{H-NMR}$  (400 MHz,  $\text{CDCl}_3$ )  $\delta$  5.35 (m, 1H, H6), 5.20 (m, 2H, H22 and 23), 2.24 (m, 2H, H4a and 4e), 0.92 (m, 3H, H19), 0.82 (m, 6H, H26 and 27), 0.69 (s, 3H, H18).

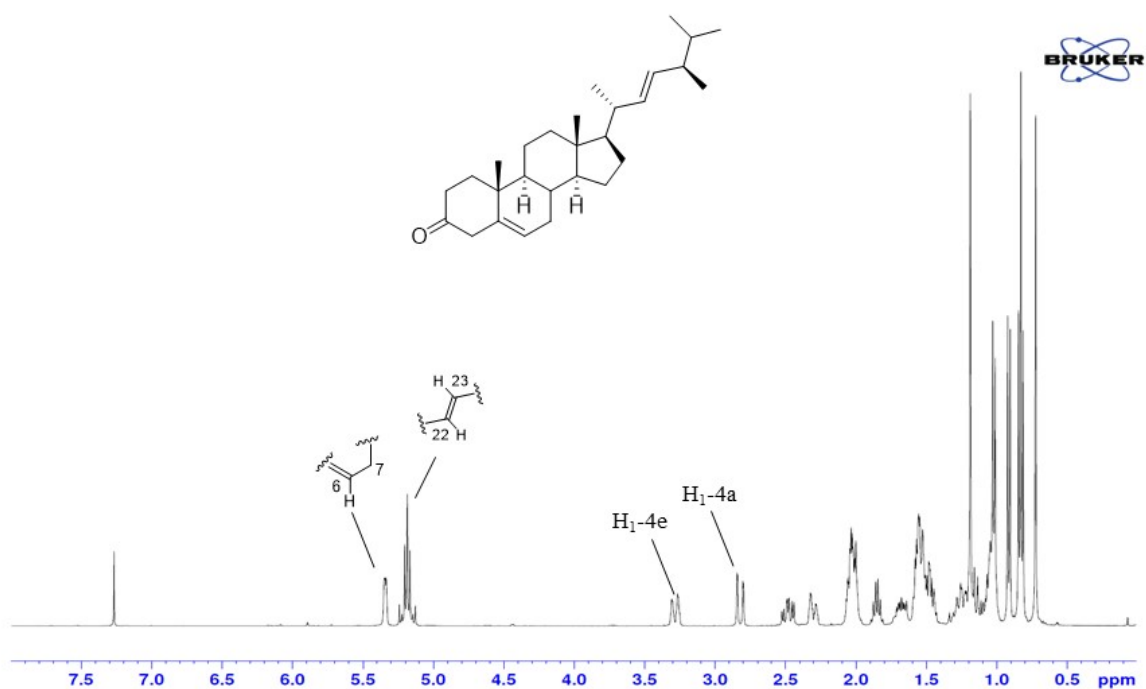

**Figure S5**  $^1\text{H-NMR}$  spectrum of brassicasterone (compound **1**).

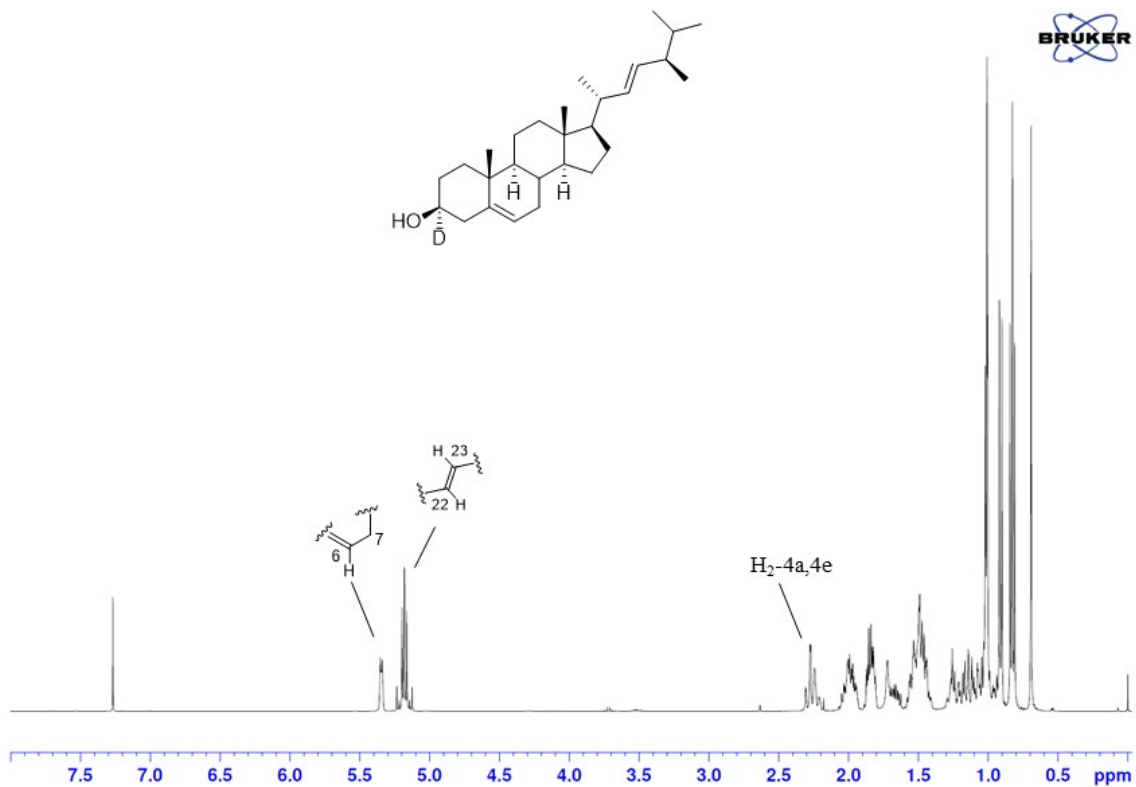

**Figure S6** <sup>1</sup>H-NMR spectrum of brassicasterol-*d*<sub>1</sub>



### III. Calibration curves of ergosterol- $d_1$ and brassicasterol- $d_1$

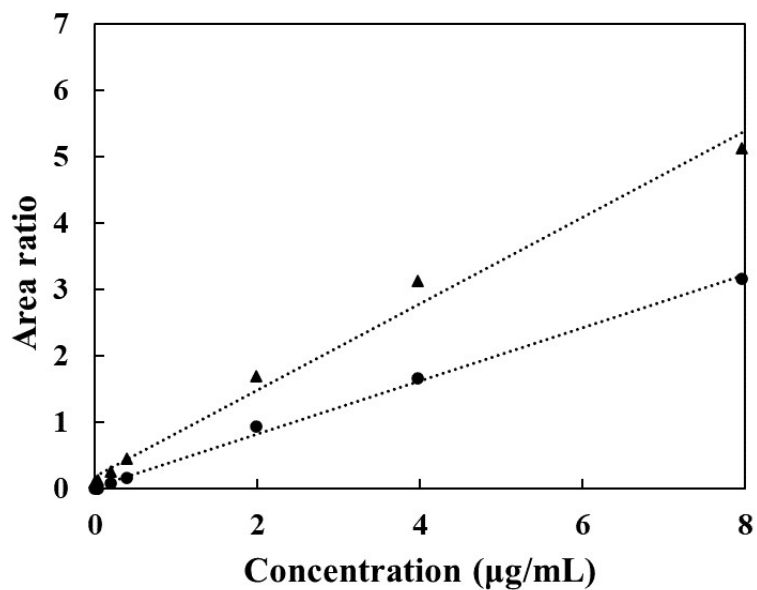

**Figure S7** Calibration curves of ergosterol- $d_1$  (●) and brassicasterol- $d_1$  (▲) based on the peak area ratio to IS (6-ketocholestanol). The linearity and range of each curve were shown in Table 2. The corresponding chromatograms for the concentration point of 4 µg/mL ergosterol- $d_1$  and brassicasterol- $d_1$  were shown in Figures 2D and 2E, respectively. Figures S8A and S8B shows the chromatograms of 0.04 µg/mL ergosterol- $d_1$  and 0.02 µg/mL brassicasterol- $d_1$ , respectively.

#### IV. MRM Chromatograms of the lower limit of quantification

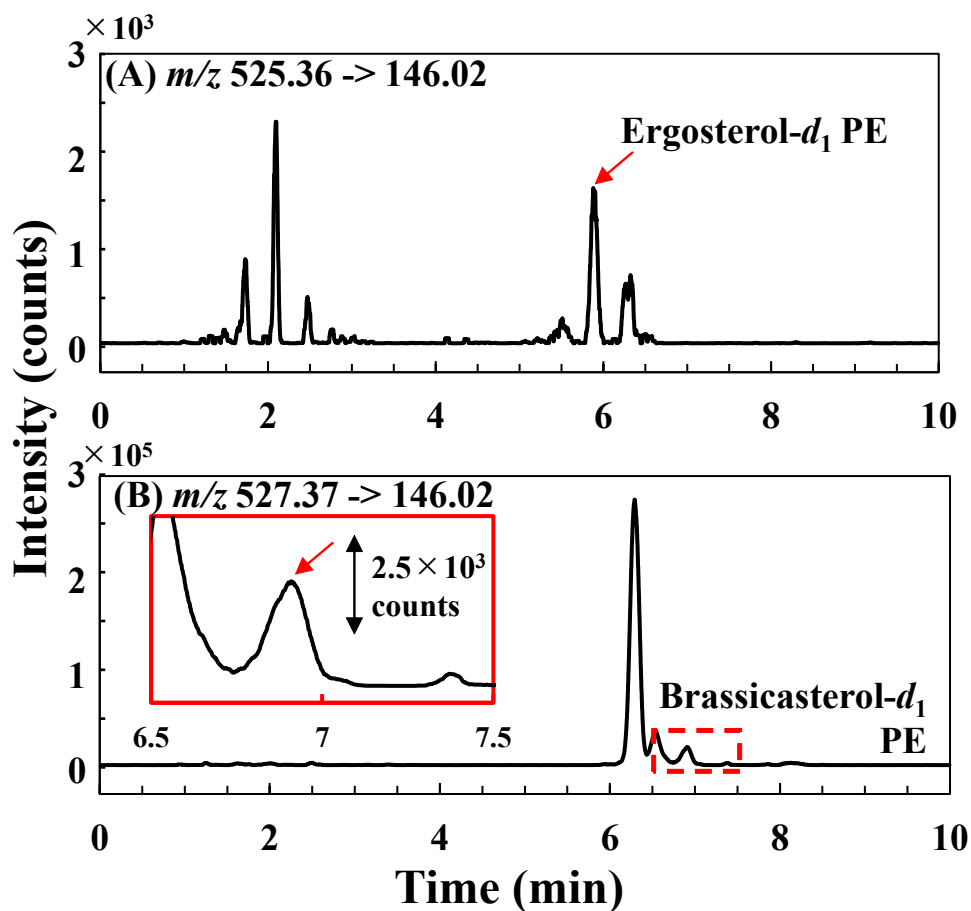

**Figure S8** Multiple reaction monitoring chromatograms of the lower limit of quantification (LLOQ). (A) 0.04  $\mu\text{g/mL}$  ergosterol- $d_1$  in the presence of the pooled control SHRSP serum. (B) 0.02  $\mu\text{g/mL}$  brassicasterol- $d_1$  in the presence of the pooled control SHRSP serum. The inset indicates an expanded chromatogram of a boxed area. Sample preparation and LC-MS conditions were same as Figure 2.
